# Supplementary material
Source: publisher site journal article supplement (https://www.spandidos-publications.com/7609/downloadSupplementary)
Supplement: Supplementary file 1 [file downloadSupplementary]

**Table SI.** Clinical features of 65 laryngeal squamous cell carcinoma samples that underwent reverse transcription-quantitative PCR analysis.

| <b>Parameter</b>               | <b>Number of cases (%)</b> |
|--------------------------------|----------------------------|
| Age, years                     |                            |
| ≤60                            | 29 (44.6)                  |
| >60                            | 36 (55.4)                  |
| Sex                            |                            |
| Female                         | 2 (3.1)                    |
| Male                           | 63 (96.9)                  |
| Primary site                   |                            |
| Glottic                        | 28 (43.1)                  |
| Supraglottic                   | 25 (38.5)                  |
| Subglottic                     | 6 (9.2)                    |
| Transglottic                   | 6 (9.2)                    |
| Differentiation                |                            |
| High                           | 13 (20.0)                  |
| Medium                         | 27 (41.5)                  |
| Low                            | 25 (38.5)                  |
| T staging <sup>a</sup>         |                            |
| T1                             | 15 (23.1)                  |
| T2                             | 20 (30.8)                  |
| T3                             | 16 (24.6)                  |
| T4                             | 14 (21.5)                  |
| Cervical lymph node metastasis |                            |
| N0                             | 49 (75.4)                  |
| N+                             | 16 (24.6)                  |
| Distant metastasis             |                            |
| M0                             | 65 (100.0)                 |
| M1                             | 0 (0.0)                    |
| Clinical stage                 |                            |
| I                              | 15 (23.1)                  |
| II                             | 17 (26.2)                  |
| III                            | 13 (20.0)                  |
| IV                             | 20 (30.8)                  |

<sup>a</sup>TNM staging is referring to the AJCC 8th edition TNM Staging Criteria.

**Table SII.** Primer sequences for quantitative PCR analysis.

| <b>Primer name</b> | <b>Forward, 5'-3'</b>   | <b>Reverse, 5'-3'</b>                                              |
|--------------------|-------------------------|--------------------------------------------------------------------|
| miR-488-3p         | TTGAAAGGCTATTTCTTGGTC   | Universal primer provided by miRNA First-Strand cDNA Synthesis Kit |
| ACVR1C             | AGTGTGAAACTTGTGCCATAGC  | ATTTCCCAGTAAACCAGACCAA                                             |
| ABCA12             | TCTTTTCTTCGCAATGGTTCTT  | TCTTTTCTTCGCAATGGTTCTT                                             |
| TNFSF11            | CAACATATCGTTGGATCACAGCA | GACAGACTCACTTTATGGGAACC                                            |
| SYT14              | CAGTCCTGAGCCCTGAAGATA   | CAGTCCTGAGCCCTGAAGATA                                              |
| 18s rRNA           | CCTGGATACCGCAGCTAGGA    | GCGGCGCAATACGAATGCCCC                                              |
| U6 RNA             | TCGCTTCGGCAGCACATAT     | ATTTGCGTGTTCATCCTTGC                                               |
| Primer-01          | CTCTTAAAGTTTTGCCTCGTC   | CTACCAATATGAAGGAATCCAC                                             |
| Primer-NC          | GCGTGGCTGGAGAGGGTAT     | AACGGCCTTTTACACACTTCTT                                             |

ACVR1C, activin A receptor type 1C; miR, microRNA; NC, negative control.
